# Supplementary material
Source: Springer Nature journal article supplement (https://www.springermedizin.de/resource/supplementary/12885_2008_1441_MOESM3_ESM.pdf/9472020)
Supplement: MOESM3 [file 9472020]

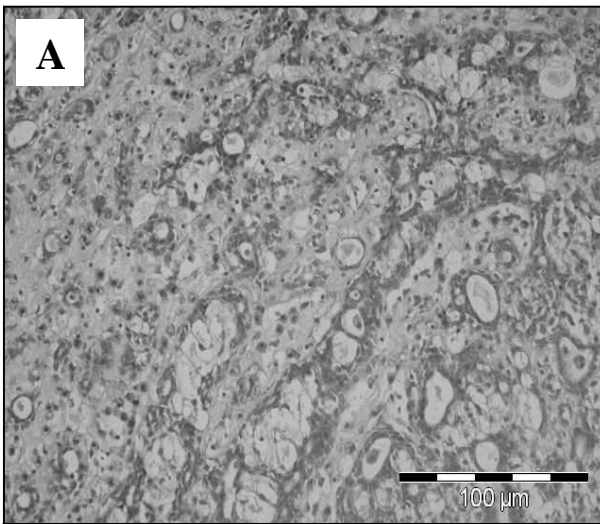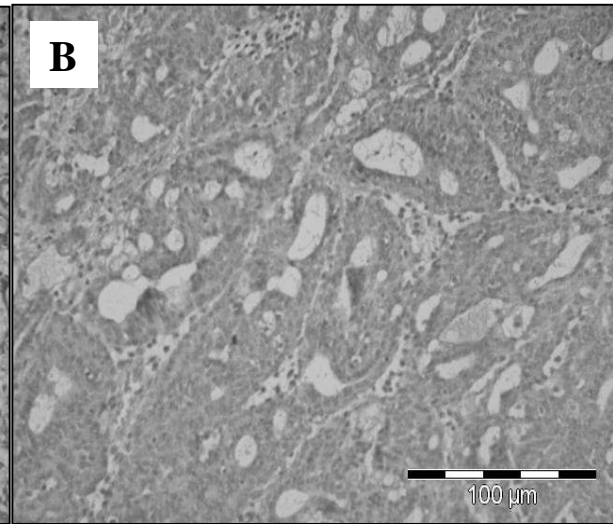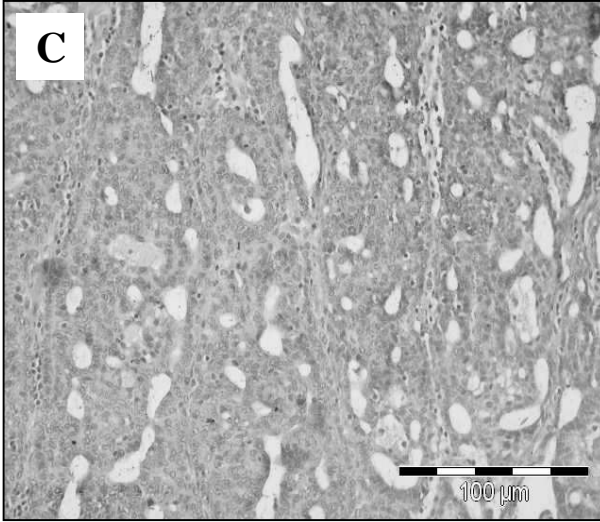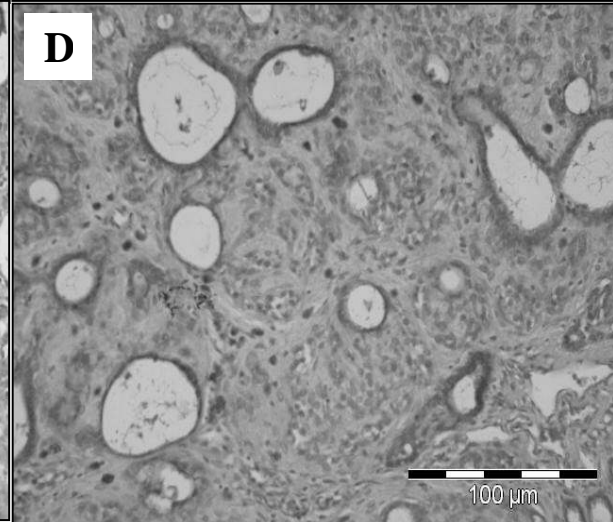

E.

| Groups | Cancer Control                    | Rosi (8mg/kg)                        | Cis (7.5mg/kg)                       | PT Rosi (8mg/kg) + Cis (7.5mg/kg) |
|--------|-----------------------------------|--------------------------------------|--------------------------------------|-----------------------------------|
| Score  | 10 Points                         | 7 Points                             | 6 Points                             | 4 Points                          |
| Grade  | Grade III (Poorly Differentiated) | Grade II (Moderately Differentiated) | Grade II (Moderately Differentiated) | Grade I (Well Differentiated)     |
